# Supplementary material for: Supplementation of amino acids and organic acids prevents the increase in blood pressure induced by high salt in Dahl salt-sensitive rats
Source: Royal Society of Chemistry journal article supplement (doi:10.1039/d1fo03577k), 2021-12-15
Supplement: d1fo03577k1.pdf [file d1fo03577k1.pdf]

## Supplementary information

Table S1 Differential metabolites in the renal medulla of SS rats between NSD and HSD group, based on GC-MS

data

| Differential metabolites   | Pvalue      | VIP     | Fold change | Regulation (HSD/NSD) |
|----------------------------|-------------|---------|-------------|----------------------|
| Lactic acid                | 7.84196E-05 | 1.78166 | 2.675804687 | Up                   |
| L-alanine                  | 0.002393016 | 1.50119 | 1.600411262 | Up                   |
| Pantothenic acid           | 0.003529512 | 1.45973 | 1.630491864 | Up                   |
| Palmitic acid              | 0.008087408 | 1.40411 | 0.153124423 | Down                 |
| O-phosphocolamine          | 0.008165094 | 1.36013 | 0.500236864 | Down                 |
| $\beta$ -glycerolphosphate | 0.009604531 | 1.34193 | 0.39882166  | Down                 |
| Creatinine                 | 0.01156596  | 1.32204 | 1.479052411 | Up                   |
| D-mannitol                 | 0.012734466 | 1.47027 | 3.296369503 | Up                   |
| L-mimosine                 | 0.013807795 | 1.32104 | 0.13311718  | Down                 |
| Pyruvic acid               | 0.022865062 | 1.21203 | 1.35777101  | Up                   |
| Stearic acid               | 0.023610512 | 1.29781 | 0.108995992 | Down                 |
| L-threonine                | 0.033617862 | 1.14777 | 1.426720766 | Up                   |
| Fumaric acid               | 0.039809284 | 1.11628 | 1.632593174 | Up                   |
| Tagatose                   | 0.040443863 | 1.11282 | 1.431984179 | Up                   |
| Inosine                    | 0.041050096 | 1.11248 | 1.372051435 | Up                   |
| Malic acid                 | 0.03742213  | 1.1382  | 0.68756735  | Down                 |
| Aspartic acid              | 0.043669903 | 1.17445 | 0.685381572 | Down                 |
| N-acetyl-D-mannosamine     | 0.049350877 | 1.2676  | 0.38663045  | Down                 |
| Pyrophosphate              | 0.049706139 | 1.18908 | 0.102566586 | Down                 |

Table S2 Differential metabolites in the renal medulla of SS rats between HSDAO and HSD group, based on GC-

MS data

| Differential metabolites        | Pvalue   | VIP     | Fold change | Regulation (HSDAO/HSD) |
|---------------------------------|----------|---------|-------------|------------------------|
| L-lysine                        | 6.18E-07 | 1.99605 | 7.60975094  | Up                     |
| L-cysteine                      | 3.73E-05 | 1.8646  | 1.87129539  | Up                     |
| N-methylalanine                 | 0.000113 | 1.86123 | 2.62661394  | Up                     |
| Lactic acid                     | 0.000218 | 1.74205 | 0.2532885   | Down                   |
| Glycine                         | 0.000229 | 1.71285 | 2.03587833  | Up                     |
| Xylitol                         | 0.002352 | 1.5094  | 1.57270727  | Up                     |
| Phosphoenolpyruvic acid         | 0.004799 | 1.77675 | 3.03092453  | Up                     |
| Gluconic acid                   | 0.004951 | 1.47703 | 1.60986358  | Up                     |
| $\beta$ -alanine                | 0.008392 | 1.41965 | 2.79003913  | Up                     |
| Xanthine                        | 0.017522 | 1.28565 | 1.70433501  | Up                     |
| O-phosphocolamine               | 0.019223 | 1.34735 | 3.06116468  | Up                     |
| L-threonine                     | 0.020985 | 1.29424 | 0.78336557  | Down                   |
| Guanosine                       | 0.02626  | 1.19166 | 1.39048428  | Up                     |
| D-glucose                       | 0.027755 | 1.18285 | 1.76285486  | Up                     |
| Methyl-beta-D-galactopyranoside | 0.035964 | 1.29032 | 1.49760561  | Up                     |
| Hypotaurine                     | 0.03698  | 1.24312 | 1.63904857  | Up                     |
| Dehydroascorbic acid            | 0.039033 | 1.22736 | 1.45253559  | Up                     |
| Ribitol                         | 0.039052 | 1.11535 | 1.49333617  | Up                     |
| $\beta$ -glycerolphosphate      | 0.044209 | 1.14411 | 1.46221186  | Up                     |

Table S3 Differential metabolites in the renal cortex of SS rats between NSD and HSD group, based on GC-MS data

| Differential metabolites  | Pvalue   | VIP     | Fold change | Regulation (HSD/NSD) |
|---------------------------|----------|---------|-------------|----------------------|
| O-phosphocolamine         | 5.12E-05 | 1.86034 | 0.621914966 | Down                 |
| Glyceric acid             | 9.21E-05 | 1.82619 | 0.608212141 | Down                 |
| Ribose                    | 0.000143 | 1.81246 | 2.111589065 | Up                   |
| Xylitol                   | 0.001313 | 1.63113 | 0.558200939 | Down                 |
| Lactic acid               | 0.001995 | 1.8536  | 1.734437013 | Up                   |
| Tartronic acid            | 0.007049 | 1.52645 | 0.414373222 | Down                 |
| D-glucose-6-phosphate     | 0.007731 | 1.46734 | 1.687970149 | Up                   |
| 2-hydroxypyridine         | 0.009343 | 1.42266 | 0.704925466 | Down                 |
| L-alanine                 | 0.009705 | 1.39765 | 2.042742282 | Up                   |
| Trans-4-hydroxy-L-proline | 0.012254 | 1.37328 | 0.794105833 | Down                 |
| Glycine                   | 0.017031 | 1.32045 | 0.830400859 | Down                 |
| Malonic acid              | 0.018197 | 1.33412 | 0.716487311 | Down                 |
| Creatinine                | 0.02035  | 1.28457 | 1.529034203 | Up                   |
| N-methylalanine           | 0.022619 | 1.30021 | 6.516020556 | Up                   |
| Citric acid               | 0.02688  | 1.29268 | 0.647322167 | Down                 |
| $\beta$ -alanine          | 0.030479 | 1.21725 | 0.679260082 | Down                 |
| D-malic acid              | 0.035718 | 1.27135 | 0.692231918 | Down                 |
| D-mannitol                | 0.036694 | 1.17985 | 1.30710166  | Up                   |
| Phosphoenolpyruvic acid   | 0.041745 | 1.16125 | 0.595219406 | Down                 |
| 3-phosphoglyceric acid    | 0.046328 | 1.17897 | 0.671242687 | Down                 |
| Hypotaurine               | 0.04678  | 1.1472  | 0.845168066 | Down                 |

Table S4 Differential metabolites in renal cortex of SS rats between HSAOC and HSD group, based on GC-MS data

| Differential metabolites   | Pvalue   | VIP     | Fold change | Regulation (HSDAO/HSD) |
|----------------------------|----------|---------|-------------|------------------------|
| Hypotaurine                | 0.001108 | 1.8246  | 0.65753523  | Down                   |
| Citric acid                | 0.003404 | 1.64901 | 0.58653707  | Down                   |
| L-leucine                  | 0.012916 | 1.49765 | 1.23875483  | Up                     |
| $\beta$ -glycerolphosphate | 0.016181 | 1.49322 | 0.82602353  | Down                   |
| Glyceric acid              | 0.017606 | 1.52979 | 0.74524163  | Down                   |
| Palatinose                 | 0.024878 | 1.351   | 0.62047656  | Down                   |
| Tagatose                   | 0.029556 | 1.36716 | 0.55303673  | Down                   |
| 2-hydroxypyridine          | 0.030657 | 1.4998  | 1.30965891  | Up                     |
| Uracil                     | 0.034004 | 1.31577 | 1.26614788  | Up                     |
| Inosine                    | 0.037462 | 1.26787 | 0.84367928  | Down                   |
| $\beta$ -alanine           | 0.037887 | 1.42176 | 0.71277273  | Down                   |
| Adenosine-5-monophosphate  | 0.038936 | 1.42829 | 0.51777747  | Down                   |
| Trans-4-hydroxy-L-proline  | 0.040231 | 1.36657 | 0.78269179  | Down                   |
| Phosphoenolpyruvic acid    | 0.040495 | 1.27297 | 1.39915291  | Up                     |
| DL-isoleucine              | 0.041704 | 1.38099 | 1.24644228  | Up                     |
| L-serine                   | 0.043095 | 1.34601 | 1.22327249  | Up                     |
| Phenylalanine              | 0.04557  | 1.34047 | 1.44686009  | Up                     |
| Glycerol 1-phosphate       | 0.048496 | 1.30244 | 0.87784986  | Down                   |
